# Supplementary material for: Probiotics counteract hepatic steatosis caused by ketogenic diet and upregulate AMPK signaling in a model of infantile epilepsy
Source: PubMed Central journal article supplement — eBioMedicine. 2022 Feb 9;76:103838. doi: 10.1016/j.ebiom.2022.103838 (PMC8882998; doi:10.1016/j.ebiom.2022.103838), 2022-02-09

## Supplemental Western blots to:

Probiotics counteract hepatic steatosis caused by ketogenic diet and upregulate AMPK signaling in a model of infantile epilepsy

Chunlong Mu<sup>a,\*</sup>, Naghmeh Nikpoor<sup>b</sup>, Thomas A. Tompkins<sup>b</sup>, Jong M. Rho<sup>c</sup>, Morris H. Scantlebury<sup>d,e</sup>, and Jane Shearer<sup>a,e</sup>

<sup>a</sup>Department of Biochemistry and Molecular Biology, Cumming School of Medicine, University of Calgary, Calgary, AB T2N 1N4, Canada

<sup>b</sup>Rosell Institute for Microbiome and Probiotics, Lallemand Health Solutions, Montreal, QC H4P 2R2, CANADA

<sup>c</sup>Division of Pediatric Neurology, Rady Children's Hospital-San Diego, Department of Neurosciences, University of California, San Diego, San Diego, CA 92123, United States

<sup>d</sup>Department of Pediatrics, Department of Clinical Neurosciences, Cumming School of Medicine, University of Calgary, Calgary, AB T2N 1N4, Canada

<sup>e</sup>Alberta Children's Hospital Research Institute, Hotchkiss Brain Institute. University of Calgary, Calgary, AB T2N 1N4, Canada

\* Corresponding author at: Department of Biochemistry and Molecular Biology, Cumming School of Medicine, University of Calgary, 2500 University Dr. NW, Calgary AB T2N 1N4, Canada

*Email address:* chunlong.mu1@ucalgary.ca (C. Mu)

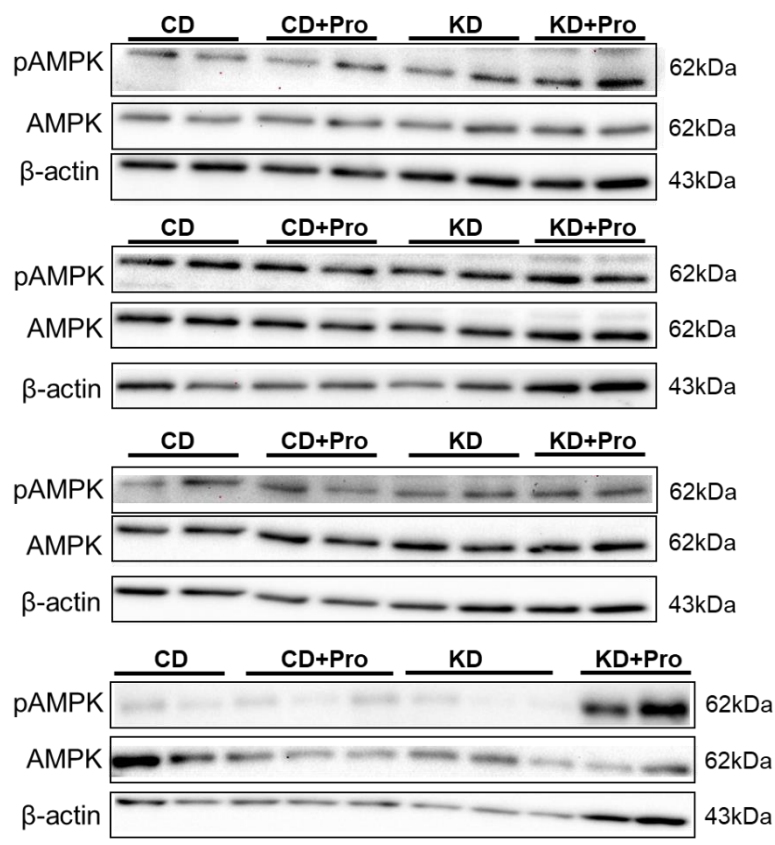

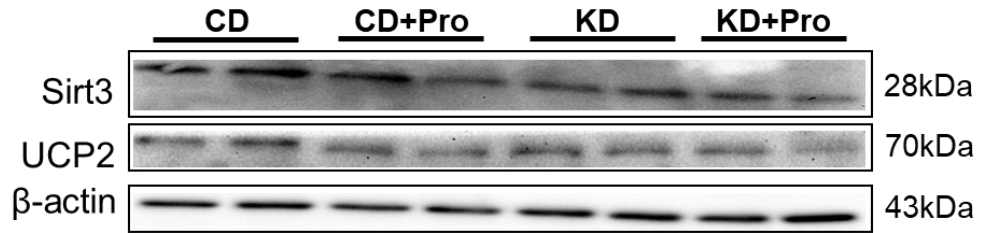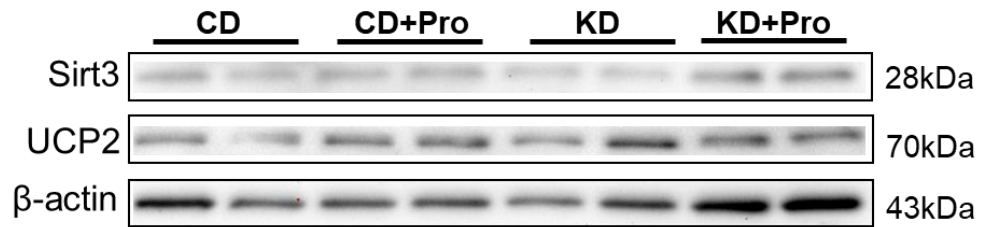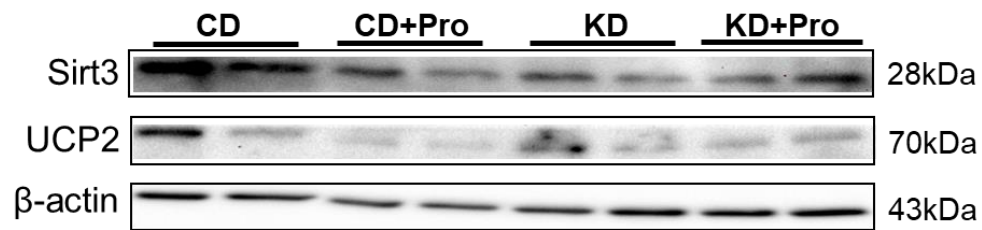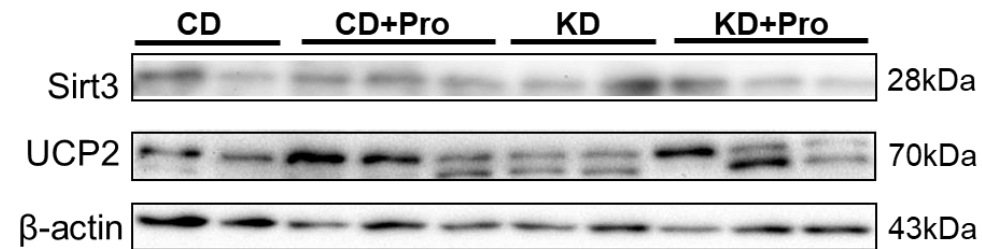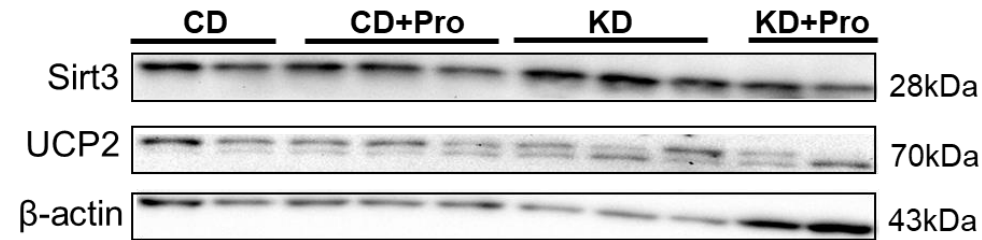

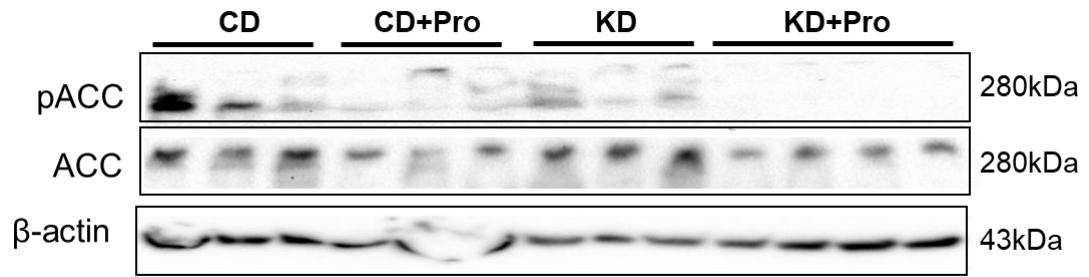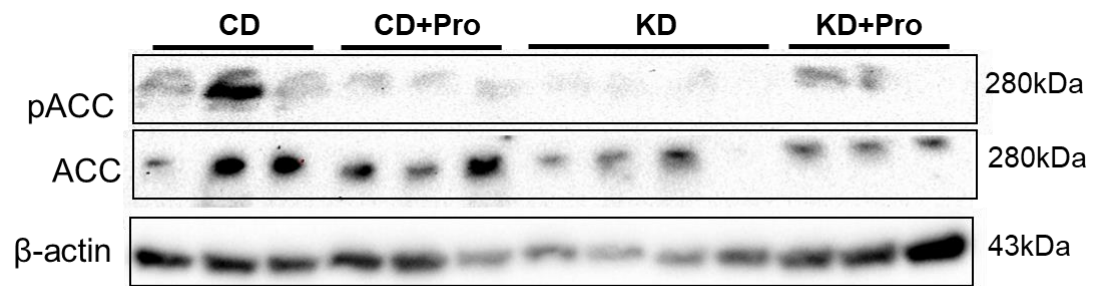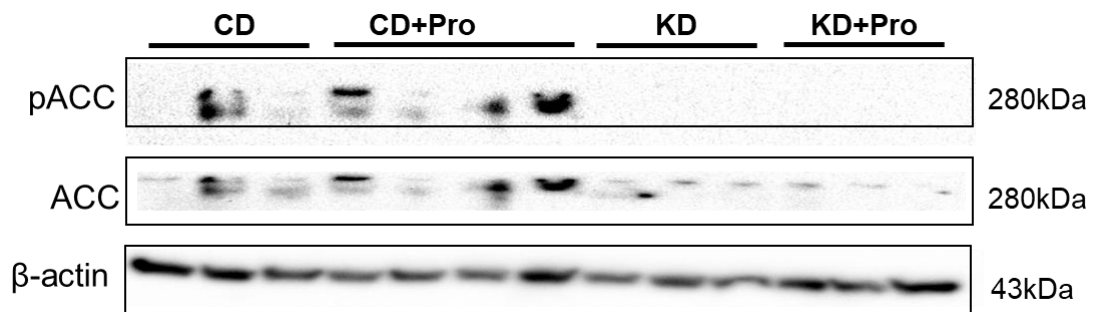

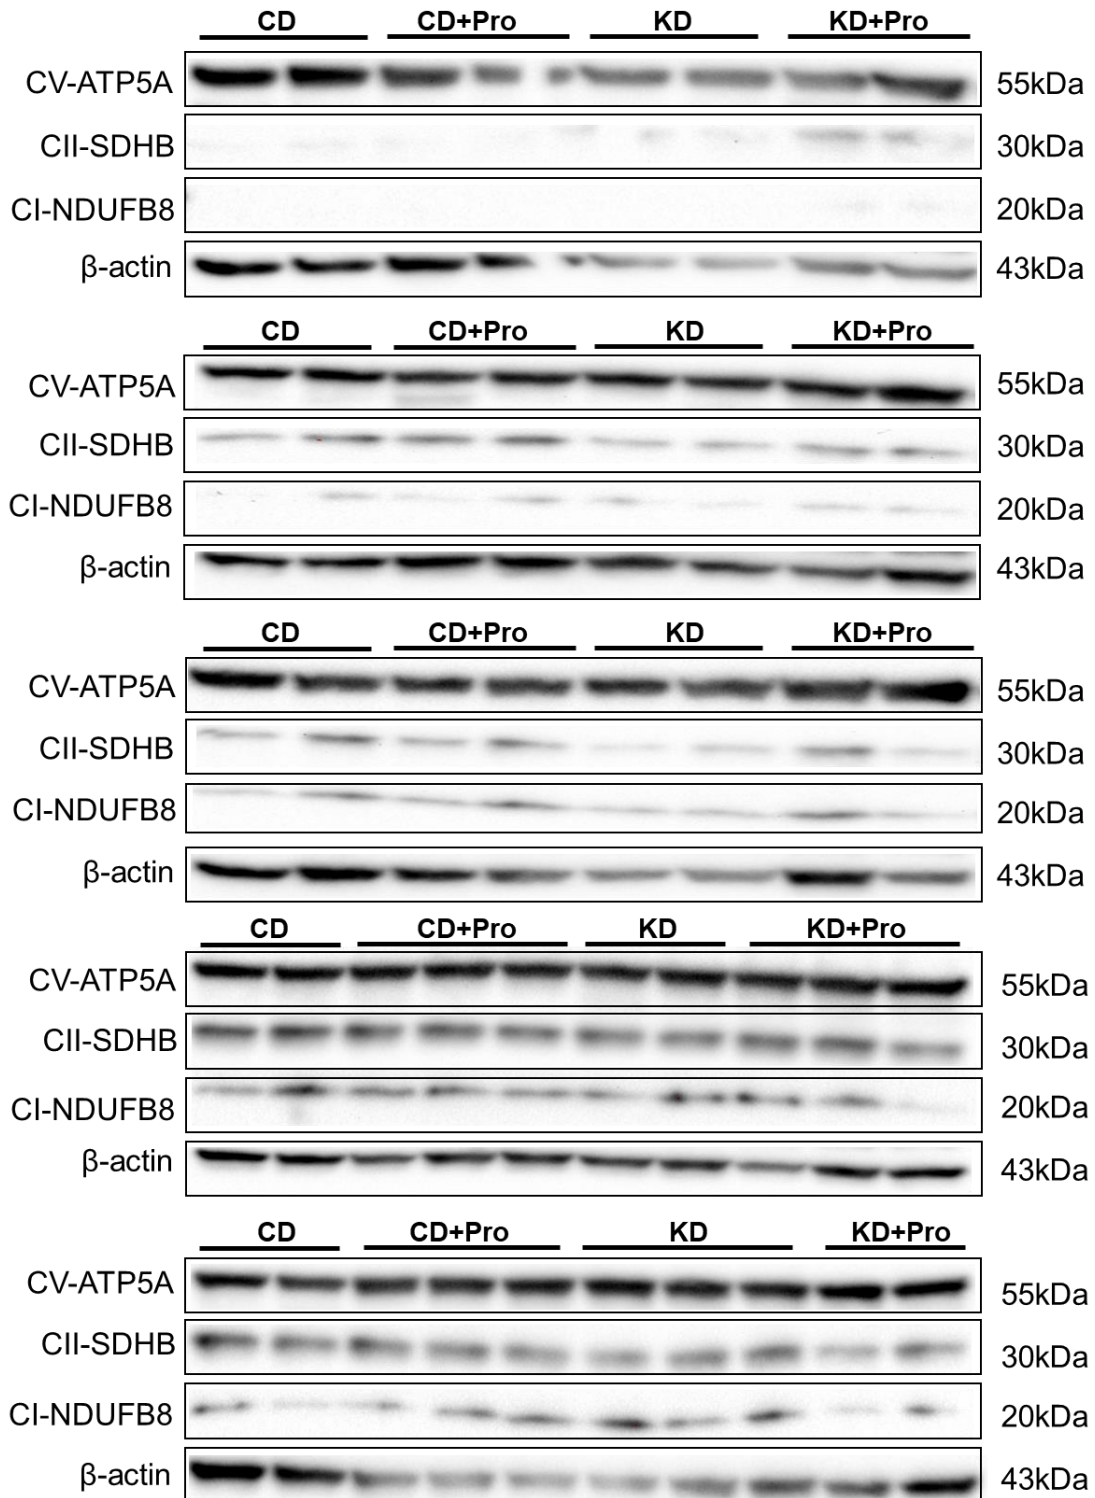

Supplement: mmc2.pdf [file mmc2.pdf]
